# Supplementary material for: Square structures and photophysical properties of Zn2Ln2 complexes (Ln = Nd, Eu, Sm, Er, Yb)
Source: Royal Society of Chemistry journal article supplement (doi:10.1039/b919170d), 2009-12-24
Supplement: b919170d.pdf [file b919170d.pdf]

# Electronic Supporting Information (ESI)

## **Square Structures and Photophysical Properties of $\text{Zn}_2\text{Ln}_2$ complexes (Ln = Nd, Eu, Sm, Er, Yb)**

Hai-Bing Xu,\* Hui-Min Wen, Zhong-Hui Chen, Jia Li, Lin-Xi Shi, and  
Zhong-Ning Chen\*

*State Key Laboratory of Structural Chemistry, Fujian Institute of Research on the Structure of  
Matter, the Chinese Academy of Sciences, Fuzhou, Fujian 350002, China*

e-mail: [haibingxu@fjirsm.ac.cn](mailto:haibingxu@fjirsm.ac.cn)

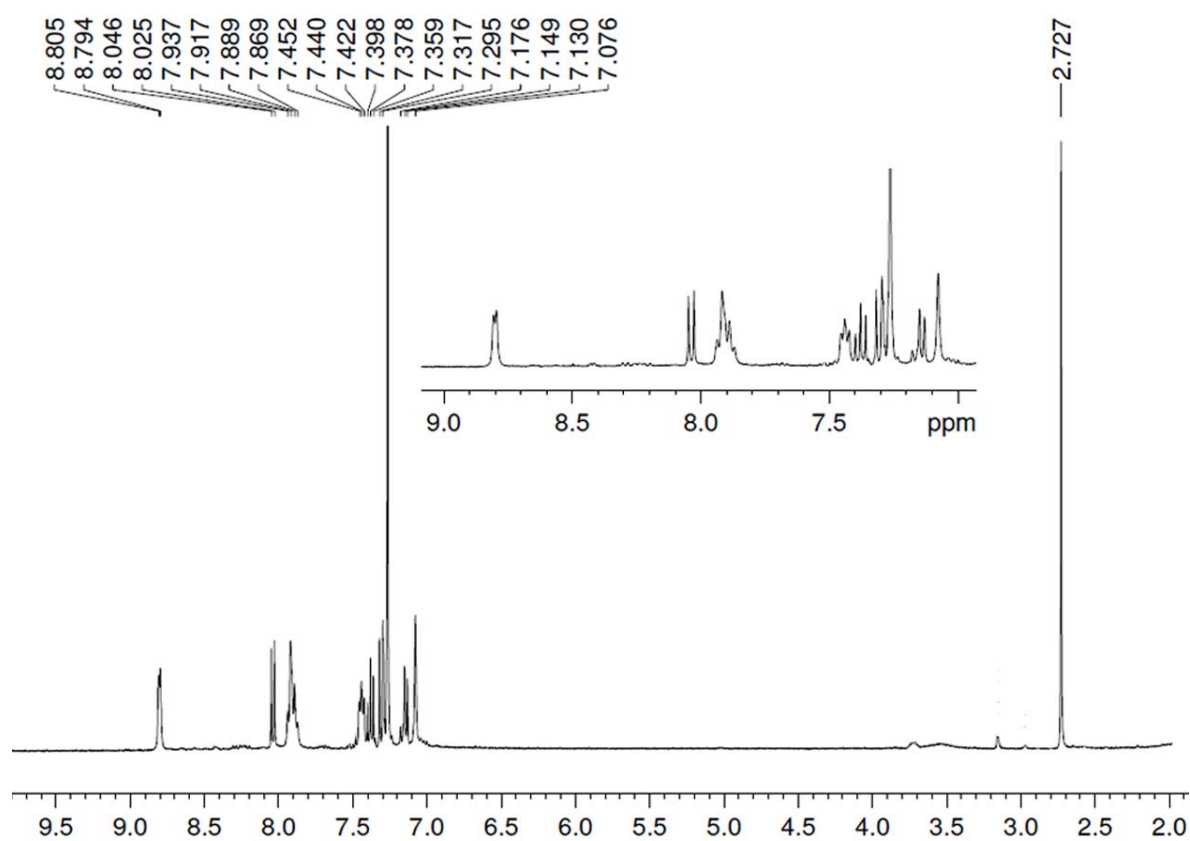

**Figure S1.**  $^1\text{H}$  NMR spectra of **1** in chloroform

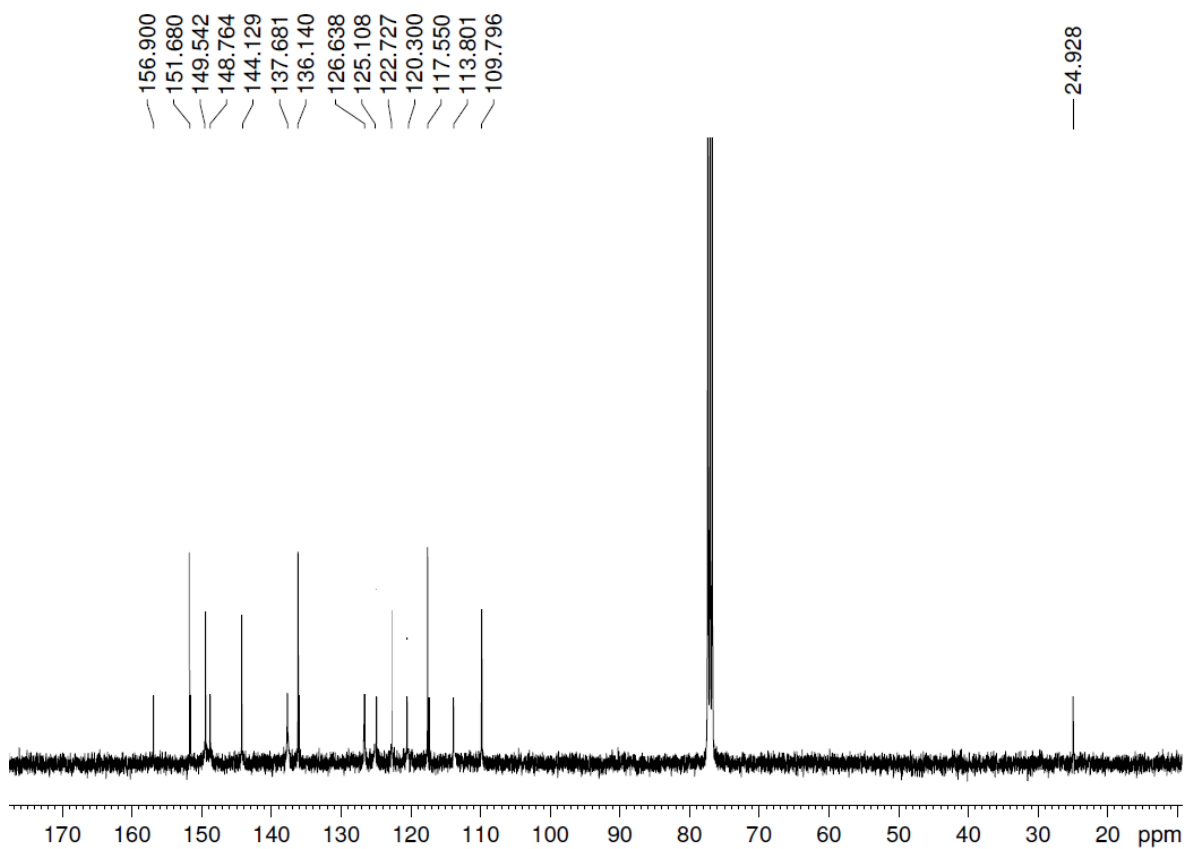

**Figure S2.**  $^{13}\text{C}$  NMR spectra of **1** in chloroform
